# Supplementary material for: CENP-B creates alternative epigenetic chromatin states permissive for CENP-A or heterochromatin assembly
Source: PubMed Central journal article supplement (PMC7438015; doi:10.1242/jcs.243303), 2020-08-11
Supplement: joces-133-243303-s1.pdf [file joces-133-243303-s1.pdf]

## Figure S1

**A**

Synthetic alphoid<sup>tetO</sup> repeats  
(about 60kbp)

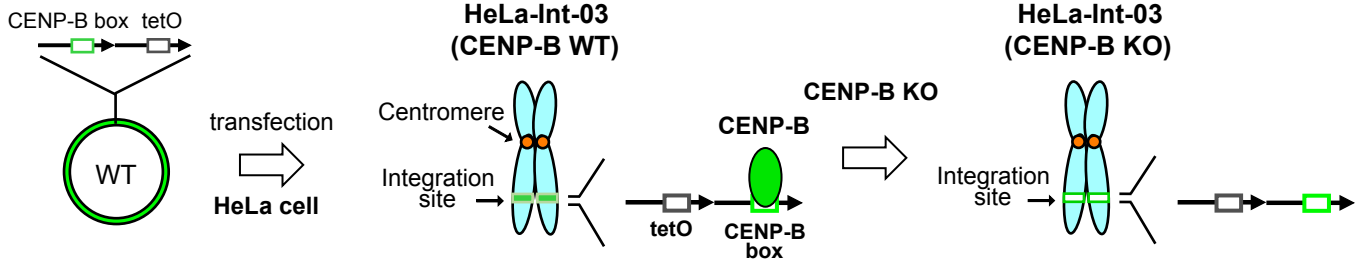

**B**

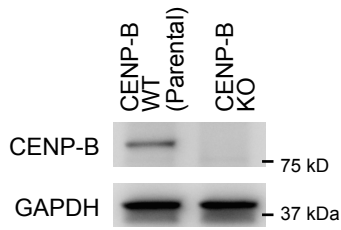

**C**

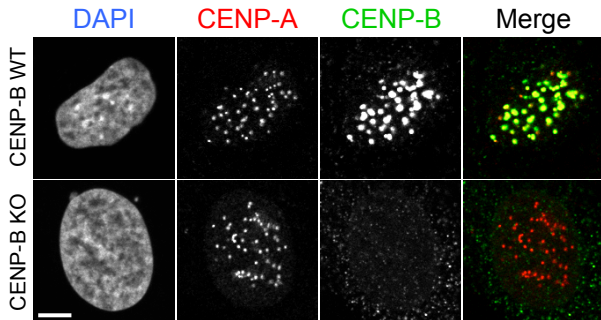

**D**

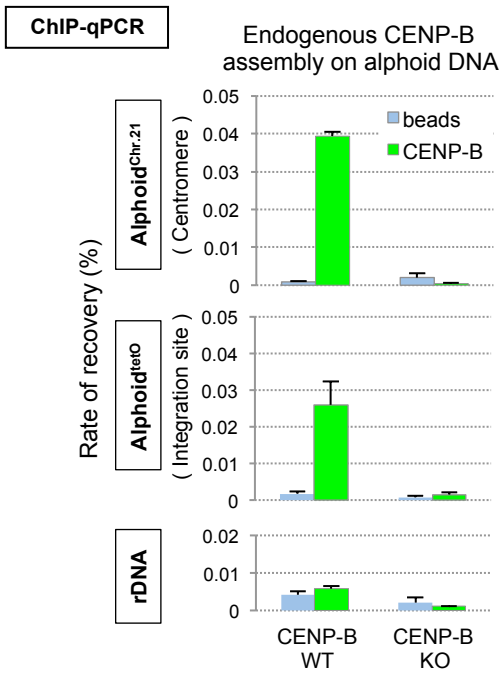

**E**

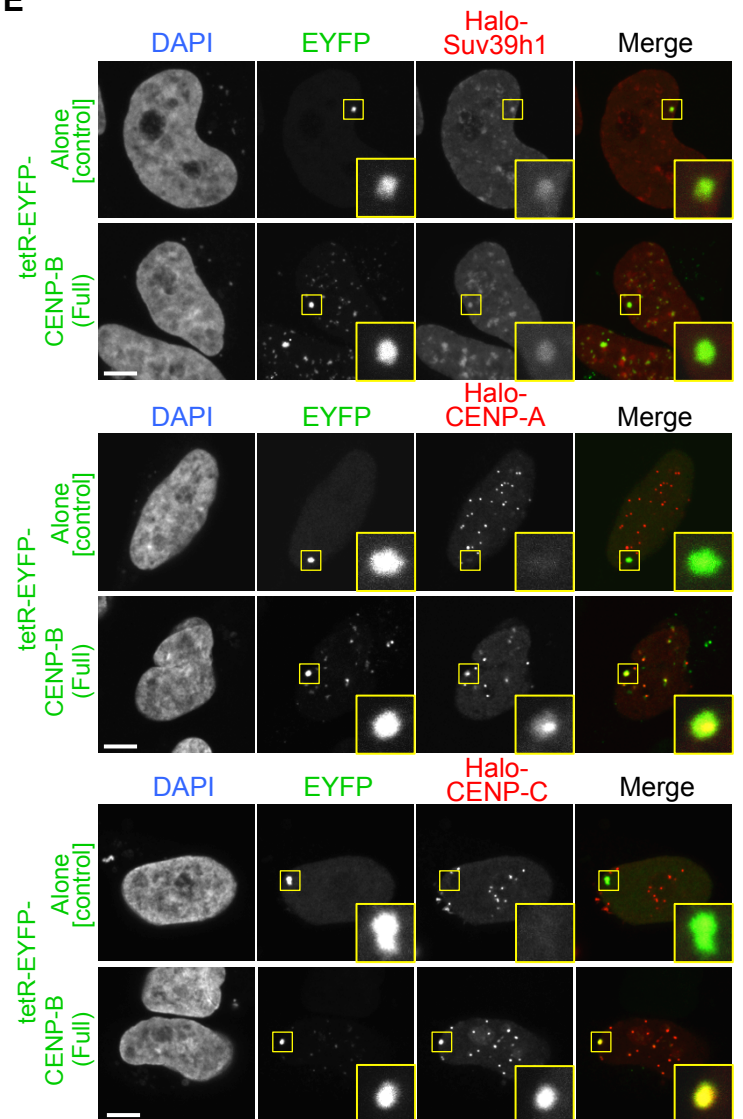

## Figure S1

### Effectiveness evaluation of FMIT assay on the screening proteins for assembling on ectopic $\text{alphoid}^{\text{tetO}}$ DNA in a CENP-B-dependent manner.

(A) Schematic drawing of strain construction. HeLa-Int-03 has an ectopic integration site of  $\text{alphoid}^{\text{tetO}}$  DNA repeats. This cell line was established in the previous study (Ohzeki et al., 2012). CENP-B gene was knocked out by CRISPR/Cas9 system. CENP-B WT and KO indicate CENP-B wild type and knockout, respectively. (B, C and D) Knockout of CENP-B gene in HeLa-Int-03 was confirmed by immunoblotting (B) and Immunostaining (C) and ChIP-qPCR assay (D) using antibodies against indicating proteins. (C) Scale bar, 5 $\mu\text{m}$ . (D) Recovered DNAs were quantified by real-time PCR using primer set for  $\text{alphoid}^{\text{tetO}}$ ,  $\text{alphoid}^{\text{chr.21}}$  and rDNA (ribosomal DNA). Rate of recovery represents IP/input (%). Results are mean  $\pm$  S.E.M. ( $n=3$  experiments). (E) Representative images of tetR-EYFP-CENP-B-dependent assembly of Halo-Suv39h1, -CENP-A and -CENP-C on  $\text{alphoid}^{\text{tetO}}$  in FMIT assay using HeLa-Int-03 CENP-B KO strain. The yellow square indicates the tetR-EYFP-protein spots (green) on  $\text{alphoid}^{\text{tetO}}$  DNA site. Scale bars, 5 $\mu\text{m}$ .

**Figure S2**

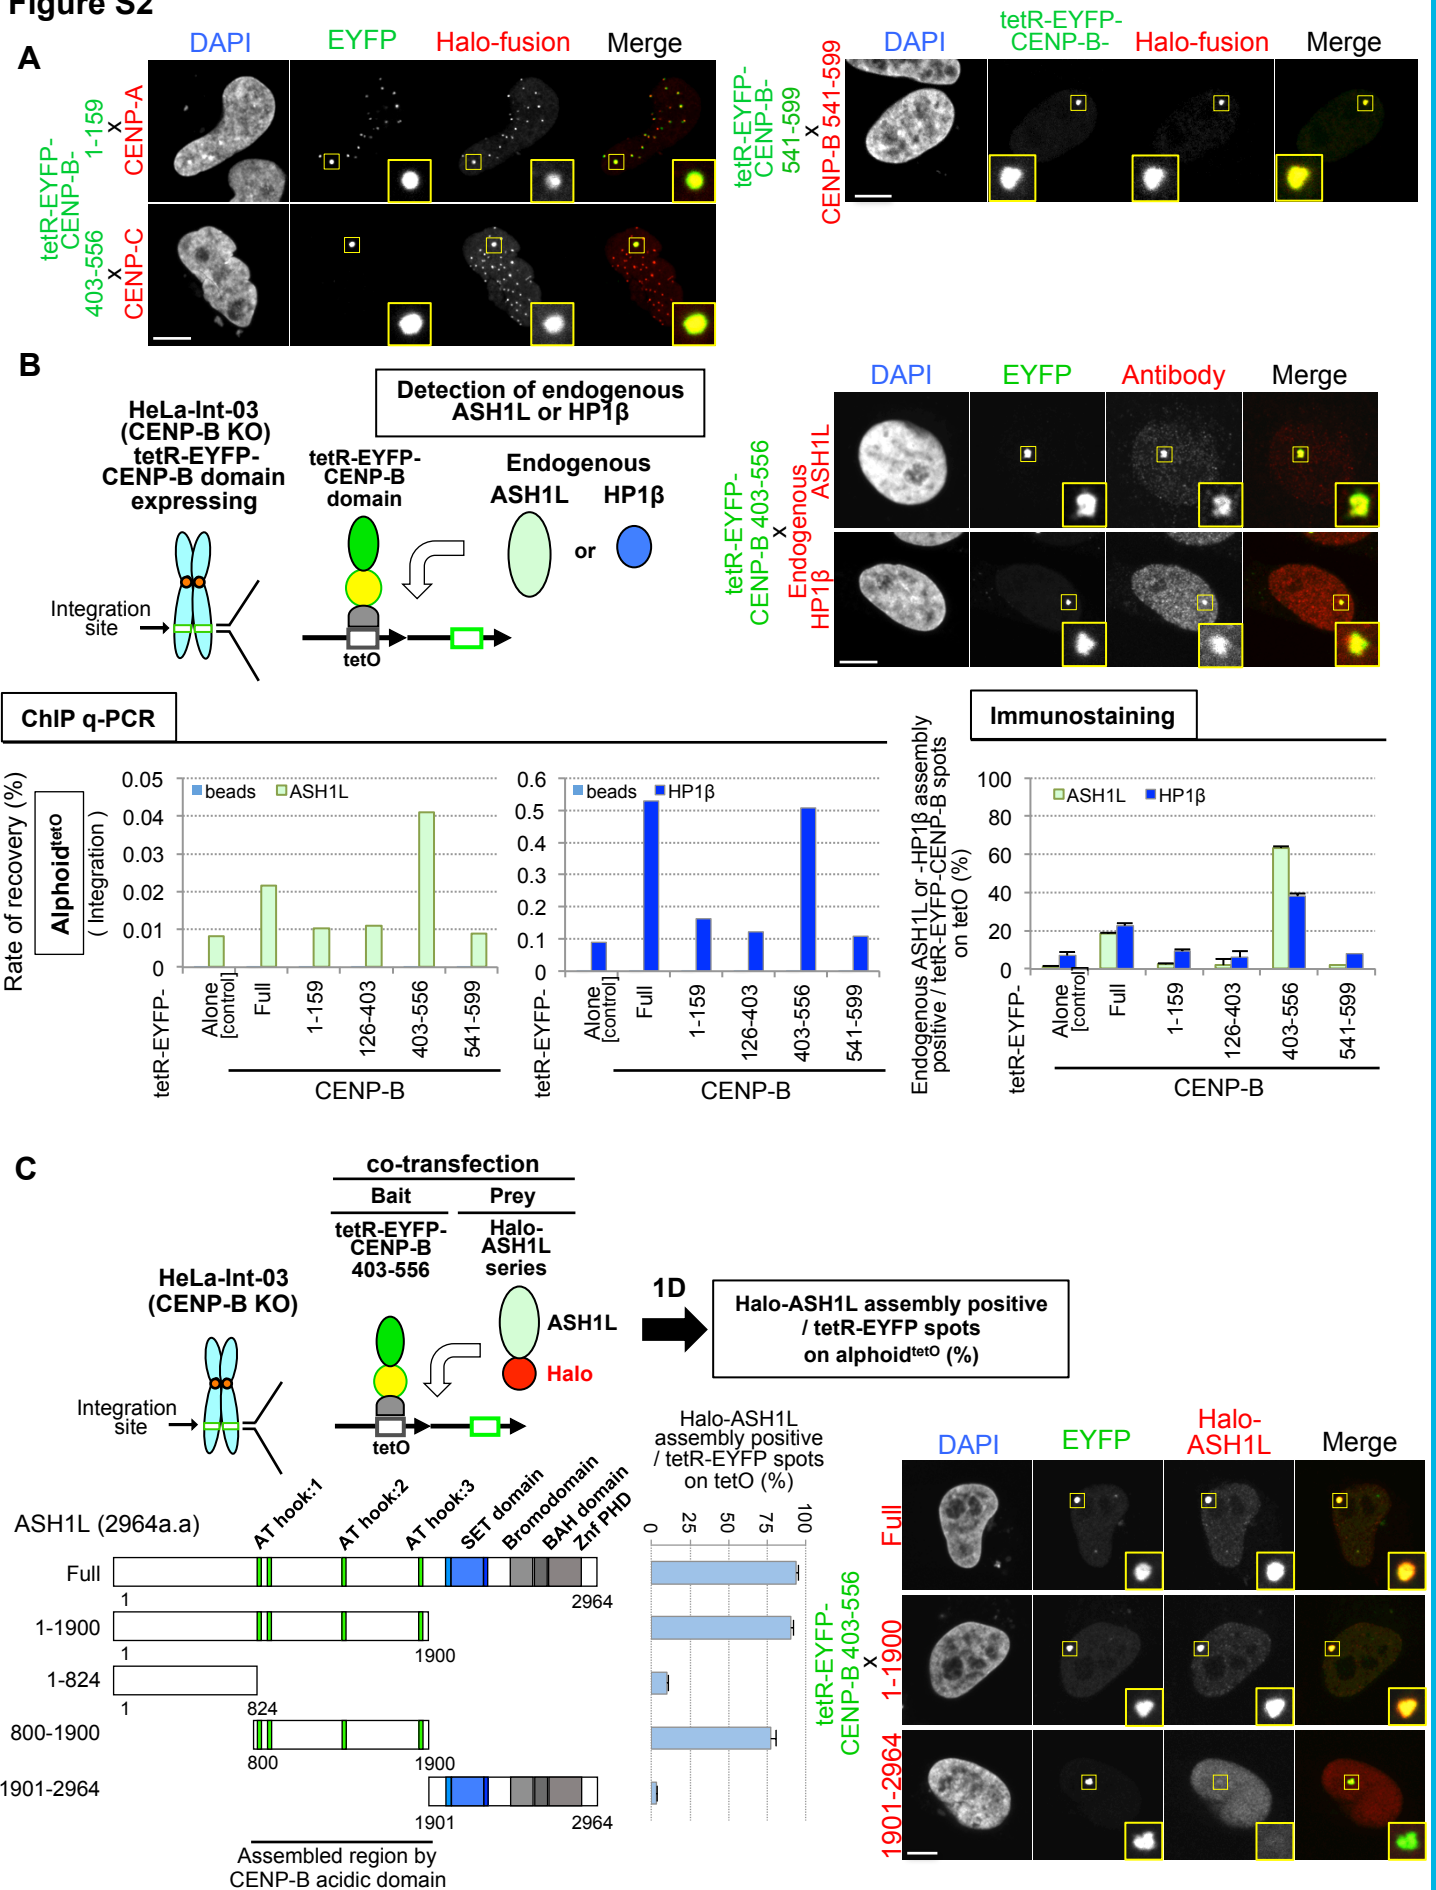

## Figure S2

### FMIT assay related to Figure 3.

(A) Representative images of co-transfected cell with expression plasmid of tetR-EYFP-CENP-B<sup>1-159</sup> and Halo-CENP-A (upper left), tetR-EYFP-CENP-B<sup>403-556</sup> and Halo-CENP-C (lower left), or tetR-EYFP-CENP-B<sup>541-599</sup> and Halo-CENP-B<sup>541-599</sup> (right) in FMIT assay (Fig.3 C). Cells were stained with DAPI and Halo-TMR ligand. The yellow square indicates the tetR-EYFP-protein spots (green) on alphoid<sup>tetO</sup> DNA integration site. Scale bars, 5 $\mu$ m. (B) Verification of CENP-B dependent assembly of endogenous ASH1L and HP1 $\beta$ . HeLa-Int-03 CENP-B KO cells expressing tetR-EYFP-Alone or -CENP-B domain series (upper left) were analyzed by cytology (upper right panel and lower right panel) and ChIP-qPCR assay ( $n=1$  experiment) (lower left panel) using antibodies against ASH1L or HP1 $\beta$ . For the cytology; The cells were stained with DAPI, anti-ASH1L or - HP1 $\beta$  antibody (red). The yellow square indicates the tetR-EYFP-CENP-B spots (green) on alphoid<sup>tetO</sup> DNA integration site. Scale bars, 5 $\mu$ m. More than 100 cells were counted to obtain the frequency of assembly for each assay (lower right panel). Results are mean  $\pm$  S.E.M. ( $n=3$  experiments). (C) Identification of ASH1L region assembled by CENP-B acidic domain tethering. Schematic drawing of FMIT assay (upper) and tested ASH1L protein domains (lower left). Lower middle; Frequency of Halo-ASH1L assembly on alphoid<sup>tetO</sup> integration site at 24 hours after transfection. More than 50 cells were counted for each assay. Results are mean  $\pm$  S.E.M. ( $n=3$  experiments). Lower right; Representative images of co-transfected cell of tetR-EYFP-CENP-B<sup>403-556</sup> expression plasmid and Halo-ASH1L series expression plasmid. The yellow square indicates the tetR-EYFP-protein spots (green) on alphoid<sup>tetO</sup> DNA integration site. Scale bars, 5 $\mu$ m.

**Figure S3**

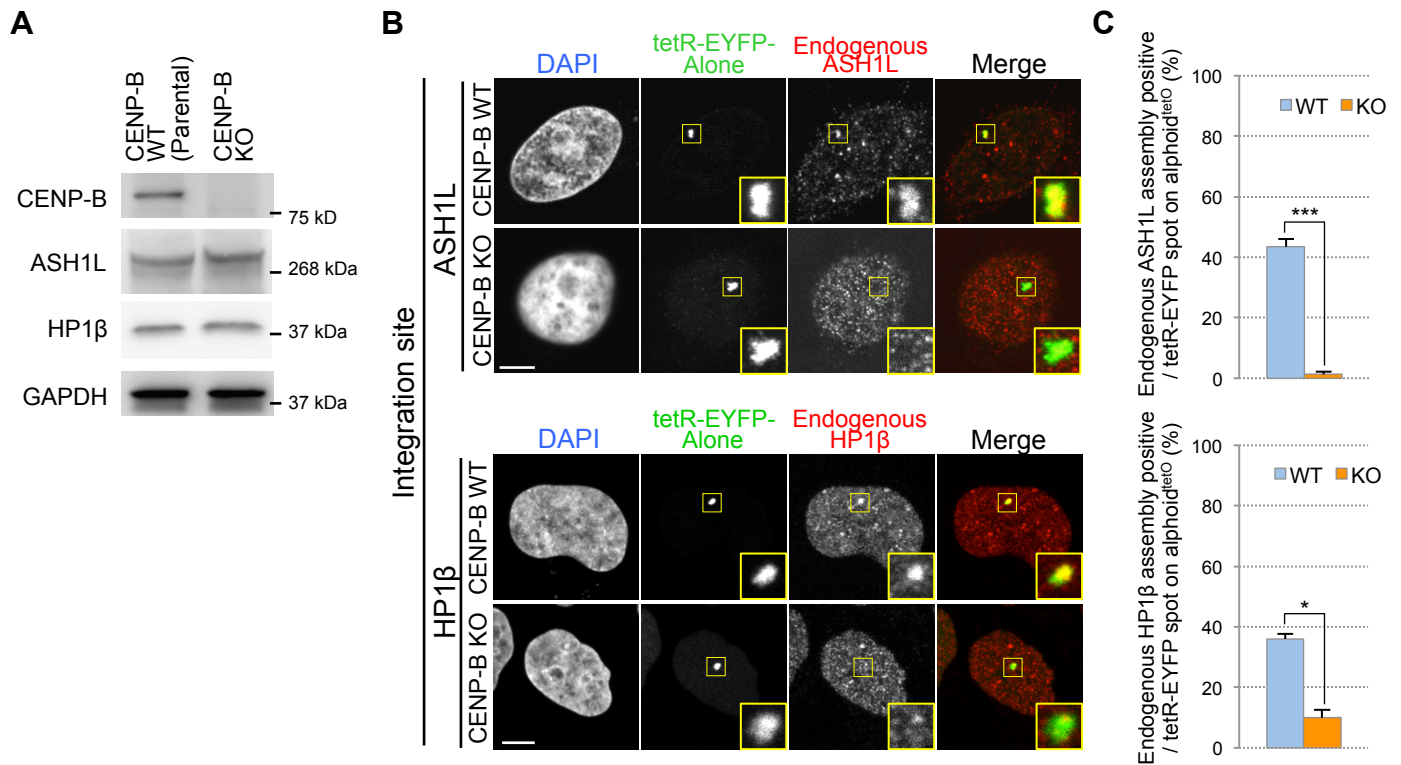

**Figure S3**

**CENP-B dependent localization of ASH1L and HP1 on ectopic alphoid<sup>tetO</sup> DNA integration site.**

(A) Immunoblot analyses of ASH1L and HP1β in CENP-B WT and CENP-B KO cell line. The antibodies used are indicated on the left. No significant difference was detected in total protein levels of ASH1L and HP1β between CENP-B WT and KO cell lines. (B and C) Detection of endogenous ASH1L or HP1β at ectopic alphoid<sup>tetO</sup> DNA integration site. tetR-EYFP-Alone expressing plasmids were transfected into HeLa-Int-03 cell line of CENP-B WT or KO. (B) The cells were stained with DAPI and anti-ASH1L or HP1β antibody (red). Yellow squares indicate the tetR-EYFP-protein spots (green) on alphoid<sup>tetO</sup> DNA site. Scale bars, 5 μm. (C) Frequency of endogenous ASH1L or HP1β assembly on the ectopic alphoid<sup>tetO</sup> DNA integration site. Endogenous signals on EYFP-spot of over 50 cells were counted. Results are mean ± S.E.M. (n=3 experiments). P-values (t-test, two-tailed) are indicated by asterisk. \*p< 0.05, \*\*\*p< 0.005.

## Figure S4

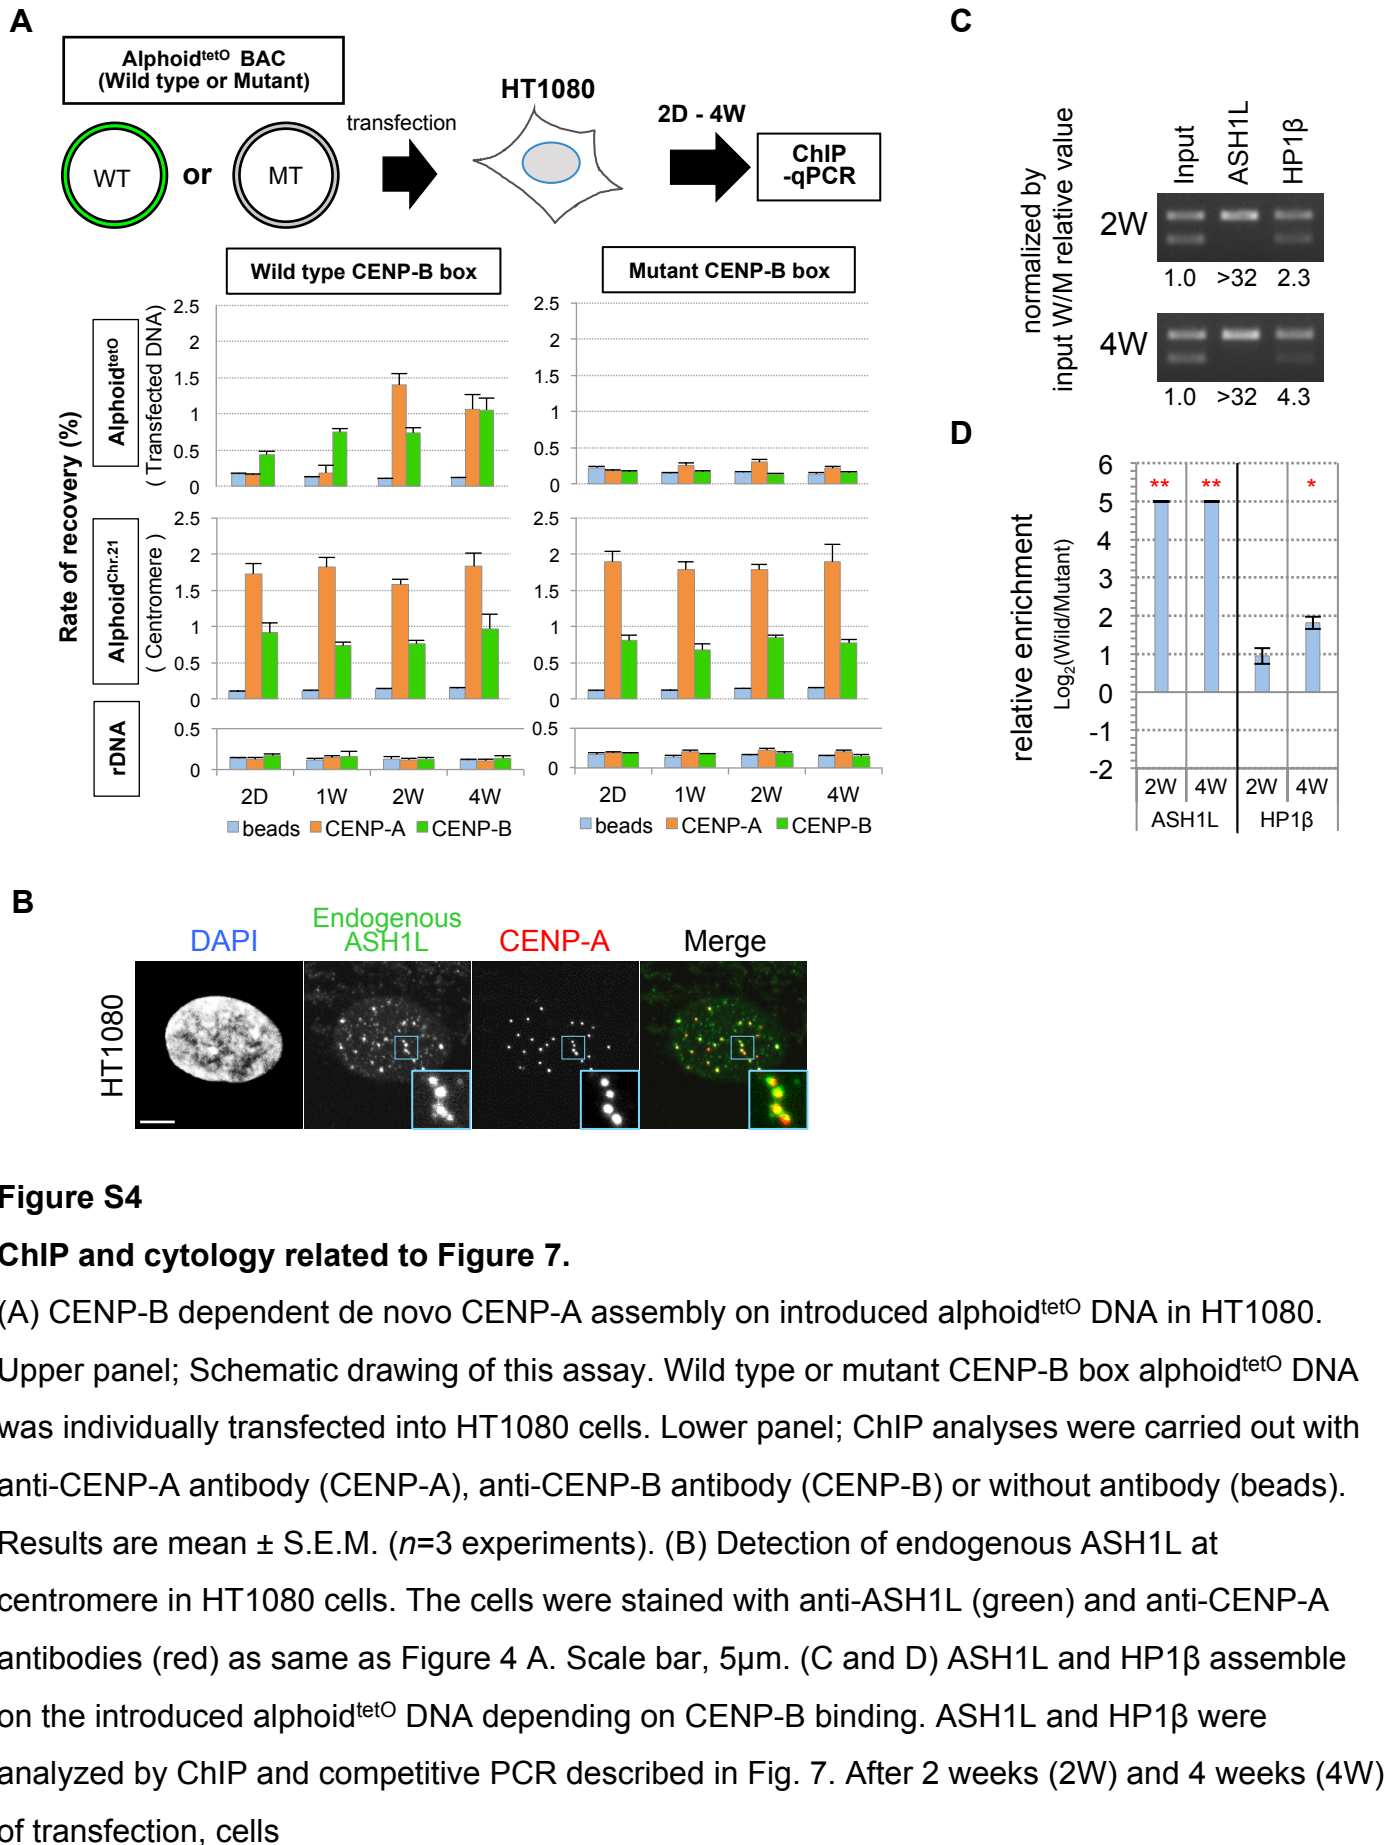

were analyzed with anti-ASH1L or -HP1 $\beta$  antibody. Results are mean  $\pm$  S.E.M. ( $n=3$  experiments). P-values ( $t$ -test, two-tailed) are indicated by asterisk. \* $p < 0.05$ , \*\* $p < 0.01$ . Red asterisk indicates 0 < WT/MT  $\log_2$  ratio.

**Figure S5**

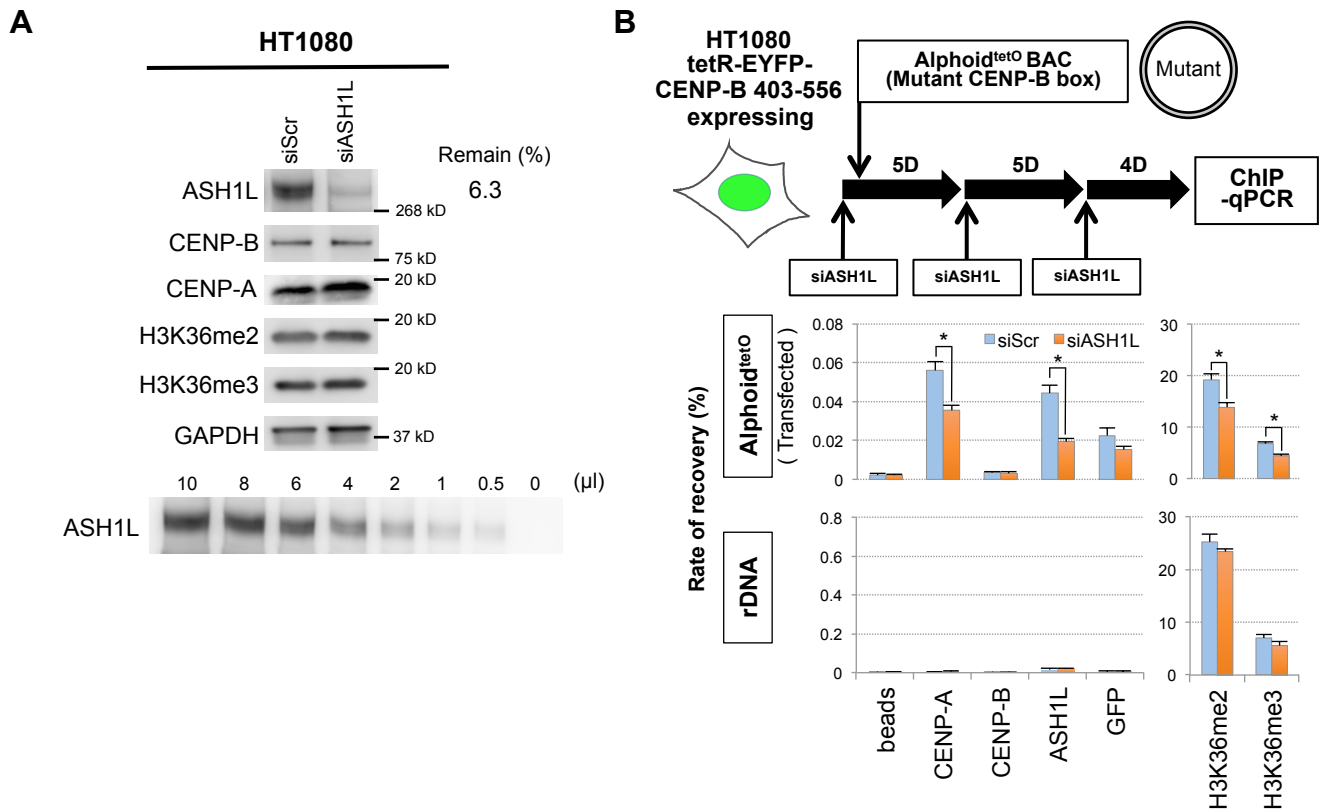

**Figure S5**

**De novo CENP-A assembly on introduced alphoid DNA decreased by ASH1L-knockdown.**(A)

Effect of ASH1L depletion by siRNA on protein expression level. The HT1080 cells were harvested at 2 weeks after the first transfection of siRNA. Each protein level was detected by western blotting using the antibody indicated in the left. ASH1L-knockdown level was calculated from the dilution series of whole cell extract. GAPDH, internal control. (B) De novo CENP-A assembly was affected by ASH1L-knockdown. Quantification of de novo CENP-A assembly on introduced mutant CENP-B box alphoid<sup>tetO</sup> DNA by ChIP assay. ChIP analyses were carried out with the antibody indicated below or without antibody (beads). Recovered DNAs were quantified by real-time PCR using primer set for alphoid<sup>tetO</sup> and rDNA. Results are mean ± S.E.M. (n=3 experiments). P-values (t-test, two-tailed) are indicated by asterisk. \*p < 0.05.
